# Supplementary material
Source: publisher figshare collection journal article supplement (https://frontiersin.figshare.com/ndownloader/files/12204047)
Supplement: Supplementary file [file 12204047]

## Supplementary Material

### Detection of antilisterial activity of 3-phenyllactic acid using *Listeria innocua* as a model

<sup>\*</sup>  
Elena Sorrentino, Patrizio Tremonte, Mariantonietta Succi, Massimo Iorizzo, Gianfranco Pannella, Silvia Jane Lombardi, Marina Sturchio, Raffaele Coppola

\* **Correspondence:** Elena Sorrentino: sorrentino@unimol.it

#### Supplementary table

**Table S1** Survival kinetic parameters estimated on *L. innocua* ATCC 33090 after exposure to phenyllactic acid at MIC concentration detected at pH 5.5 (PLA\_MIC), lactic acid at MIC concentration (LA\_MIC), lactic acid at same concentration of MIC of PLA (LA\_PLA) or without preservative agents (C).

| Samples | Models         | Log(N <sub>0</sub> ) | Sl         | K <sub>max</sub>   | 4D          | RMSE  | adj-R <sup>2</sup> |
|---------|----------------|----------------------|------------|--------------------|-------------|-------|--------------------|
|         |                | (Log CFU/mL)         | (h)        | (h <sup>-1</sup> ) | (h)         |       |                    |
| C       | Log-linear     | 8.4 ± 0.2a           | -          | 0.03 ± 0.02a       | >24         | 0.116 | 0.385              |
| PLA_MIC | Log-linear + S | 8.2 ± 0.2a           | 7.5 ± 0.4a | 0.92 ± 0.07b       | 17.5 ± 0.9a | 0.241 | 0.988              |
| LA_MIC  | Log-linear + S | 8.3 ± 0.3a           | 4.2 ± 0.3b | 0.56 ± 0.05c       | 20.9 ± 0.7b | 0.111 | 0.995              |
| LA_PLA  | Log-linear + S | 8.2 ± 0.2a           | 5.5 ± 0.4c | 0.43 ± 0.05d       | >24         | 0.126 | 0.935              |

Mean ± standard deviation of three independent experiments. Means in the same column with different letters are significantly different ( $P < 0.05$ ). Log-linear + S, Log-linear model with shoulder; N<sub>0</sub>, Initial inoculum concentration; Sl, Shoulder length; K<sub>max</sub>, First order inactivation rate constant; 4D, Logcycles of reduction; RMSE, Root mean sum of squared error; adj-R<sup>2</sup>, R-square adjusted coefficient of determination.
